# Supplementary material for: HIV-1 pathogenicity and virion production are dependent on the metabolic phenotype of activated CD4+ T cells
Source: PubMed Central journal article supplement (PMC4252996; doi:10.1186/s12977-014-0098-4), 2014-11-25
Supplement: 12977_2014_98_MOESM1_ESM.pdf [file 12977_2014_98_MOESM1_ESM.pdf]

donor 1

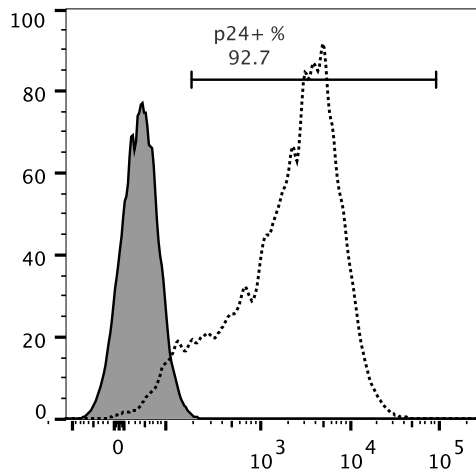

donor 2

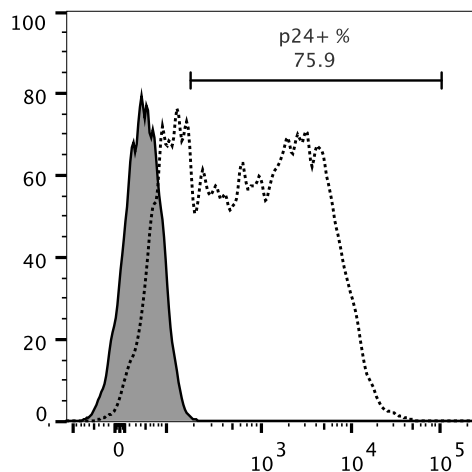

donor 3

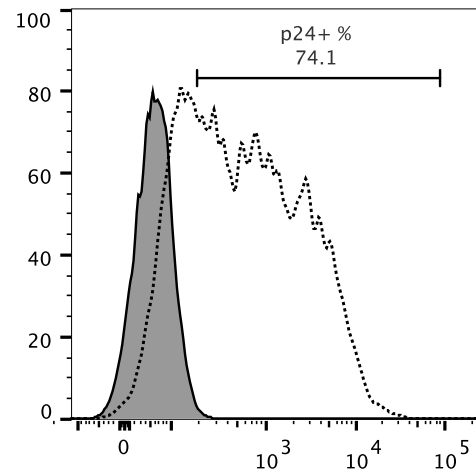

Jurkat

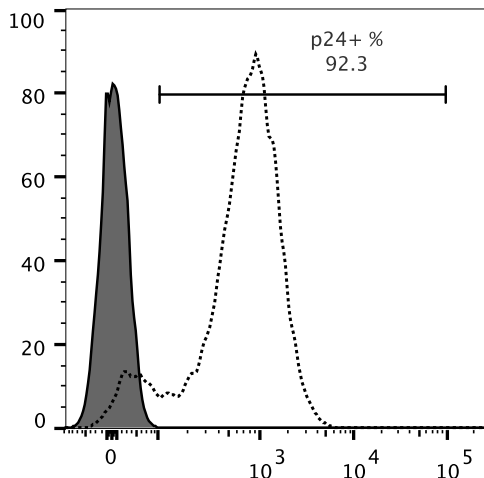

CEM-ss

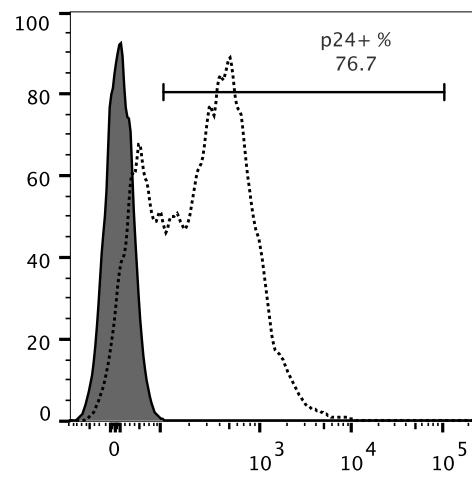

■ HIV-1 NL4.3  $\Delta$  Env

□ HIV-1 NL4.3 wt

→ p24<sup>Gag</sup>
