# Supplementary material for: HIV-1 pathogenicity and virion production are dependent on the metabolic phenotype of activated CD4+ T cells
Source: Springer Nature journal article supplement (doi:10.1186/s12977-014-0098-4), 2014-11-25

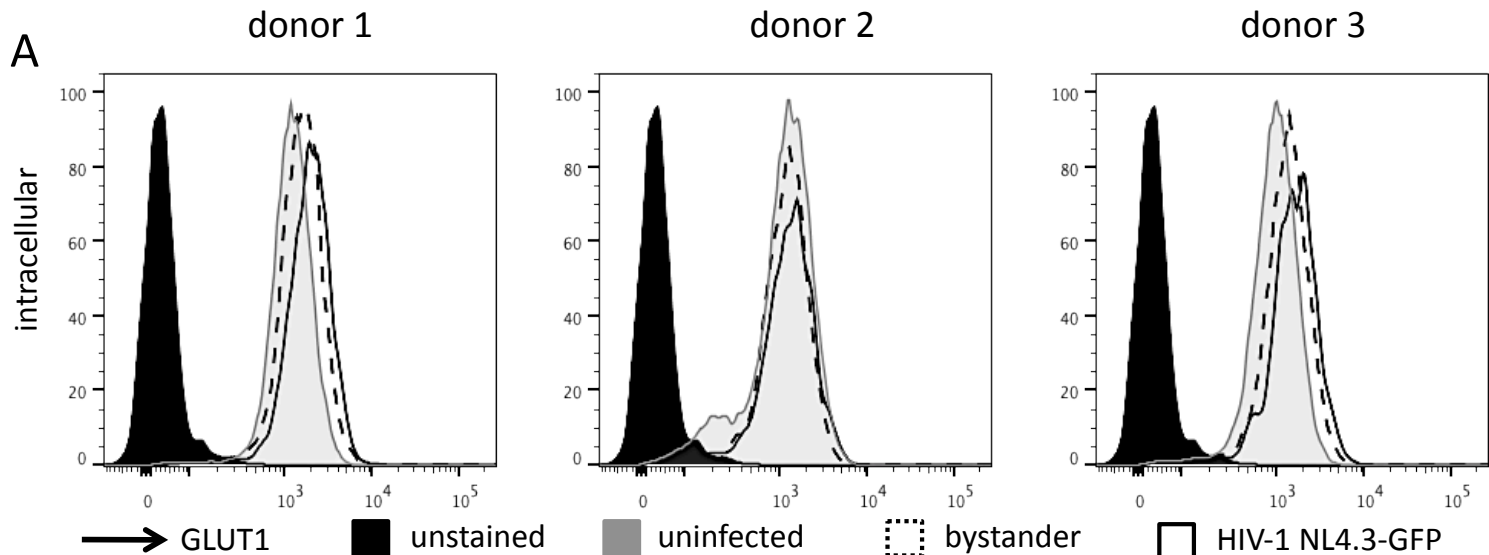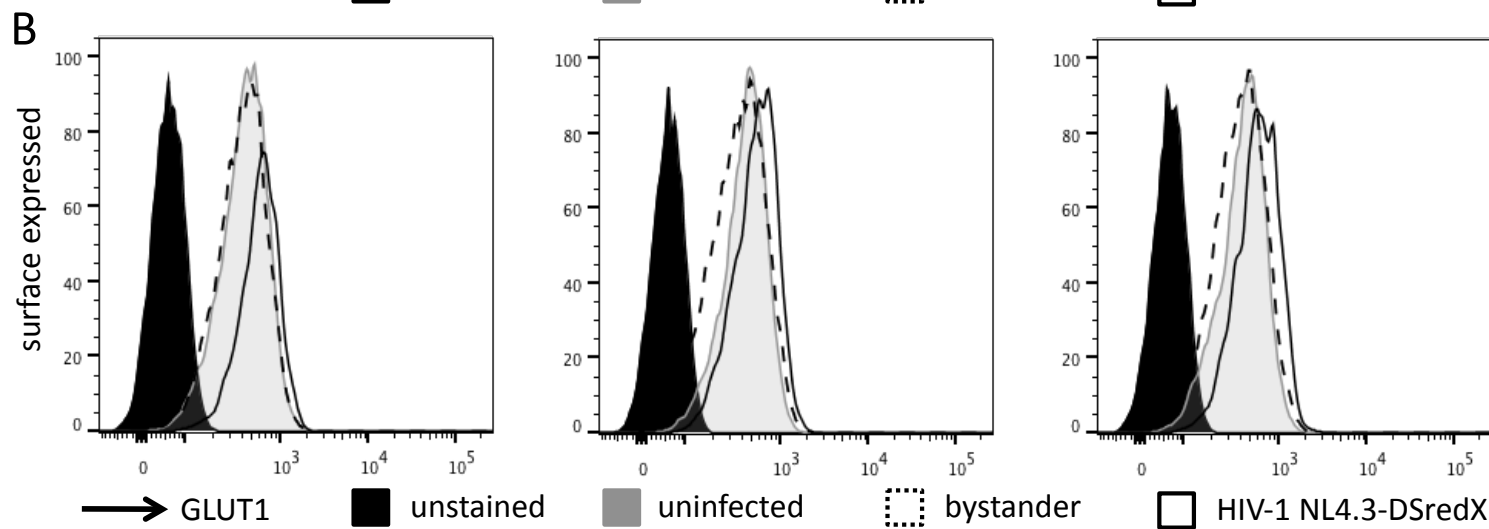

**C**

| surface-expressed GLUT1 | unstained | uninfected | bystander | infected |
|-------------------------|-----------|------------|-----------|----------|
| donor 1                 | 69.5      | 527        | 501       | 746      |
| donor 2                 | 69.5      | 544        | 463       | 694      |
| donor 3                 | 78.2      | 533        | 492       | 732      |

median fluorescence intensity in relative fluorescence units

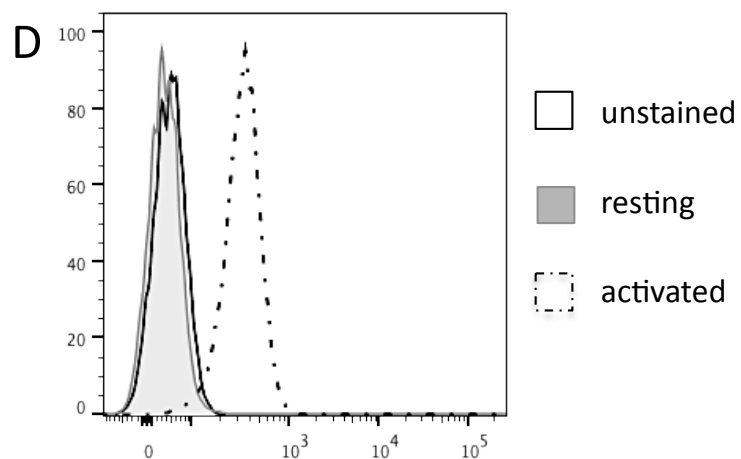

Supplement: 12977_2014_98_MOESM3_ESM.pdf [file 12977_2014_98_MOESM3_ESM.pdf]
