# Supplementary material for: HIV-1 pathogenicity and virion production are dependent on the metabolic phenotype of activated CD4+ T cells
Source: PubMed Central journal article supplement (PMC4252996; doi:10.1186/s12977-014-0098-4), 2014-11-25

relative p24<sup>Gag+</sup> cells

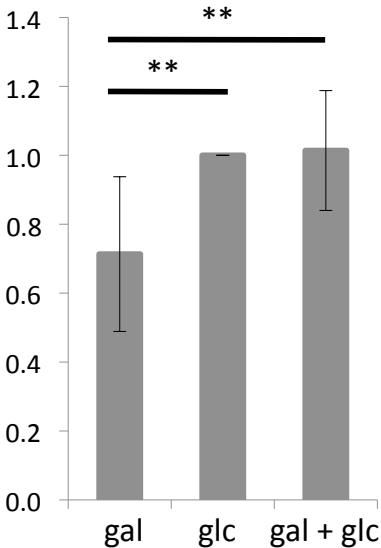

Supplement: 12977_2014_98_MOESM12_ESM.pdf [file 12977_2014_98_MOESM12_ESM.pdf]
